# Supplementary material
Source: PubMed Central journal article supplement (PMC8759095)
Supplement: mmc1.pdf [file mmc1.pdf]

1 **Supplementary table 1.** Allergic disease (asthma, hay fever or eczema) genetic  
 2 instrumental variants (IVs).

| SNP        | EA  | NEA | EAF   | Beta   | SE    | <i>p</i> val |
|------------|-----|-----|-------|--------|-------|--------------|
| rs12123821 | T   | C   | 0.048 | 0.116  | 0.014 | 1.04E-16     |
| rs61816766 | C   | T   | 0.980 | 0.142  | 0.018 | 6.76E-16     |
| rs1214598  | A   | G   | 0.332 | -0.040 | 0.006 | 2.14E-11     |
| rs7521390  | C   | A   | 0.716 | 0.036  | 0.006 | 1.39E-08     |
| rs301802   | A   | T   | 0.459 | 0.048  | 0.006 | 1.33E-16     |
| rs1289273  | G   | A   | 0.573 | 0.035  | 0.006 | 1.09E-09     |
| rs760805   | T   | A   | 0.578 | 0.037  | 0.006 | 3.79E-10     |
| rs74847330 | G   | A   | 0.878 | -0.050 | 0.009 | 1.67E-08     |
| rs34290285 | A   | G   | 0.265 | -0.077 | 0.008 | 1.16E-24     |
| rs4973380  | A   | T   | 0.243 | 0.040  | 0.007 | 2.59E-09     |
| rs10174949 | A   | G   | 0.316 | -0.066 | 0.006 | 9.92E-26     |
| rs10865050 | A   | G   | 0.153 | -0.125 | 0.008 | 6.37E-50     |
| rs6800001  | A   | G   | 0.342 | 0.033  | 0.006 | 2.28E-08     |
| rs10663129 | ACT | A   | 0.672 | 0.038  | 0.006 | 1.25E-09     |
| rs61192126 | C   | T   | 0.691 | -0.038 | 0.006 | 1.56E-09     |
| rs519973   | A   | G   | 0.354 | 0.036  | 0.006 | 3.23E-09     |
| rs9877752  | A   | G   | 0.412 | 0.040  | 0.006 | 4.98E-12     |
| rs80064395 | T   | C   | 0.058 | -0.073 | 0.011 | 1.31E-11     |
| rs10033073 | G   | A   | 0.650 | 0.044  | 0.007 | 1.36E-09     |
| rs5743618  | A   | C   | 0.299 | -0.092 | 0.007 | 2.73E-42     |
| rs228619   | G   | A   | 0.531 | 0.036  | 0.006 | 2.41E-10     |
| rs58939053 | T   | C   | 0.344 | 0.054  | 0.006 | 3.85E-19     |
| rs6881706  | T   | G   | 0.293 | -0.071 | 0.006 | 1.73E-28     |
| rs72774901 | A   | T   | 0.082 | 0.112  | 0.011 | 3.92E-25     |
| rs740474   | T   | C   | 0.417 | -0.036 | 0.006 | 6.59E-10     |
| rs6594499  | A   | C   | 0.481 | -0.072 | 0.006 | 1.10E-36     |
| rs249677   | A   | C   | 0.361 | 0.037  | 0.006 | 7.54E-10     |
| rs2910162  | G   | A   | 0.684 | 0.034  | 0.006 | 1.54E-08     |
| rs16903574 | G   | C   | 0.918 | 0.070  | 0.011 | 1.68E-10     |
| rs848      | C   | A   | 0.764 | -0.060 | 0.007 | 1.62E-16     |
| rs1419675  | T   | G   | 0.242 | -0.039 | 0.007 | 4.72E-08     |
| rs2854001  | A   | G   | 0.184 | 0.054  | 0.007 | 3.31E-14     |
| rs2134814  | G   | C   | 0.646 | -0.043 | 0.006 | 1.03E-12     |
| rs34004019 | G   | A   | 0.696 | -0.091 | 0.007 | 2.52E-38     |
| rs9372120  | G   | T   | 0.825 | 0.041  | 0.007 | 1.02E-08     |
| rs3128959  | A   | G   | 0.124 | -0.060 | 0.010 | 2.25E-10     |
| rs4296977  | T   | C   | 0.158 | -0.053 | 0.008 | 6.92E-11     |
| rs6461503  | C   | T   | 0.527 | -0.041 | 0.006 | 8.81E-13     |
| rs17664743 | A   | G   | 0.204 | 0.041  | 0.007 | 8.27E-09     |

|             |   |   |       |        |       |          |
|-------------|---|---|-------|--------|-------|----------|
| rs2221641   | T | C | 0.388 | -0.042 | 0.006 | 1.03E-12 |
| rs6990534   | G | A | 0.643 | -0.040 | 0.006 | 1.74E-10 |
| rs12551834  | A | G | 0.080 | -0.062 | 0.010 | 2.72E-09 |
| rs144829310 | T | G | 0.157 | 0.083  | 0.008 | 2.60E-26 |
| rs2477923   | C | T | 0.502 | -0.033 | 0.006 | 7.23E-09 |
| rs62626322  | G | T | 0.903 | 0.067  | 0.009 | 1.35E-13 |
| rs12413578  | T | C | 0.099 | -0.093 | 0.009 | 3.31E-23 |
| rs479844    | G | A | 0.571 | 0.041  | 0.006 | 1.15E-12 |
| rs2212434   | T | C | 0.429 | 0.087  | 0.006 | 8.92E-52 |
| rs10789841  | C | T | 0.691 | -0.046 | 0.006 | 1.48E-12 |
| rs12365699  | A | G | 0.153 | -0.059 | 0.008 | 3.54E-14 |
| rs11236814  | T | A | 0.908 | -0.065 | 0.010 | 3.25E-11 |
| rs11033545  | G | T | 0.558 | 0.033  | 0.006 | 2.40E-08 |
| rs11168245  | G | C | 0.801 | -0.047 | 0.007 | 1.41E-11 |
| rs6489785   | C | T | 0.631 | -0.043 | 0.006 | 3.57E-13 |
| rs1689510   | C | G | 0.316 | 0.051  | 0.006 | 3.39E-17 |
| rs1059513   | C | T | 0.890 | -0.083 | 0.009 | 1.15E-18 |
| rs4943794   | C | G | 0.226 | 0.040  | 0.007 | 1.41E-08 |
| rs1885013   | A | G | 0.359 | -0.038 | 0.006 | 1.33E-09 |
| rs10519067  | A | G | 0.140 | -0.052 | 0.009 | 1.10E-09 |
| rs8030821   | T | A | 0.611 | 0.034  | 0.006 | 1.54E-08 |
| rs3540      | A | G | 0.345 | -0.035 | 0.006 | 1.28E-08 |
| rs12440045  | C | A | 0.548 | 0.040  | 0.006 | 7.68E-12 |
| rs56375023  | A | G | 0.213 | 0.073  | 0.007 | 3.11E-27 |
| rs3024665   | T | C | 0.077 | 0.067  | 0.012 | 2.18E-08 |
| rs2241099   | G | C | 0.738 | -0.070 | 0.007 | 4.62E-26 |
| rs12941864  | T | C | 0.466 | -0.034 | 0.006 | 4.98E-08 |
| rs7224129   | A | G | 0.473 | 0.054  | 0.006 | 8.11E-21 |
| rs7406234   | C | T | 0.565 | -0.034 | 0.006 | 4.30E-09 |
| rs11658582  | G | C | 0.566 | 0.056  | 0.006 | 2.07E-21 |
| rs10414065  | T | C | 0.078 | -0.092 | 0.012 | 2.29E-14 |
| rs6011033   | G | A | 0.776 | 0.044  | 0.007 | 2.66E-10 |
| rs2766678   | A | G | 0.213 | -0.056 | 0.007 | 2.95E-14 |
| rs12625547  | G | T | 0.786 | -0.043 | 0.008 | 1.98E-08 |
| rs5758343   | T | A | 0.782 | -0.047 | 0.007 | 2.17E-11 |

3 SNP: single-nucleotide polymorphism. EA: effect allele. NEA: non-effect allele. EAF:  
4 effect allele frequency. Beta: the regression coefficient based on Allergic disease  
5 (asthma, hay fever or eczema) raising effect allele. SE: standard error.

6

7 **Supplementary table 2.** Genome-wide association study (GWAS) for COVID-19.

| <b>GWAS ID</b>   | <b>Year</b> | <b>Trait</b>         | <b>ncase</b> | <b>ncontrol</b> | <b>nsnp</b> | <b>Population</b> | <b>PMID</b> |
|------------------|-------------|----------------------|--------------|-----------------|-------------|-------------------|-------------|
| ebi-a-GCST010780 | 2020        | COVID-19 (RELEASE 4) | 14,134       | 1,284,876       | 12,508,741  | European          | 32404885    |

8 COVID-19: corona virus disease 2019; GWAS ID: genome wide association study

9 identity; ncase: the number of MS case; ncontrol: the number of the control; nsnp: the

10 number of single-nucleotide polymorphism; PMID: pubMed unique identifier.

11

12 **Supplementary table 3.** Association of allergic disease genetic IVs in COVID-19

13 GWAS dataset.

| SNP         | Exposure (allergic disease) GWAS |       |              | Outcome (COVID-19) GWAS |       |              |
|-------------|----------------------------------|-------|--------------|-------------------------|-------|--------------|
|             | Beta                             | SE    | <i>p</i> val | Beta                    | SE    | <i>p</i> val |
| rs10033073  | 0.044                            | 0.007 | 1.36E-09     | -0.001                  | 0.014 | 0.963        |
| rs10174949  | -0.066                           | 0.006 | 9.92E-26     | -0.003                  | 0.014 | 0.849        |
| rs10414065  | -0.092                           | 0.012 | 2.29E-14     | 0.020                   | 0.029 | 0.485        |
| rs10519067  | -0.052                           | 0.009 | 1.10E-09     | 0.000                   | 0.017 | 0.997        |
| rs1059513   | -0.083                           | 0.009 | 1.15E-18     | -0.006                  | 0.021 | 0.779        |
| rs10663129  | 0.038                            | 0.006 | 1.25E-09     | 0.002                   | 0.018 | 0.928        |
| rs10789841  | -0.046                           | 0.006 | 1.48E-12     | 0.004                   | 0.015 | 0.796        |
| rs10865050  | -0.125                           | 0.008 | 6.37E-50     | 0.016                   | 0.017 | 0.358        |
| rs11033545  | 0.033                            | 0.006 | 2.40E-08     | -0.005                  | 0.015 | 0.737        |
| rs11168245  | -0.047                           | 0.007 | 1.41E-11     | -0.016                  | 0.016 | 0.294        |
| rs11236814  | -0.065                           | 0.010 | 3.25E-11     | -0.008                  | 0.022 | 0.716        |
| rs11658582  | 0.056                            | 0.006 | 2.07E-21     | 0.005                   | 0.014 | 0.734        |
| rs12123821  | 0.116                            | 0.014 | 1.04E-16     | -0.007                  | 0.037 | 0.859        |
| rs1214598   | -0.040                           | 0.006 | 2.14E-11     | 0.004                   | 0.015 | 0.803        |
| rs12365699  | -0.059                           | 0.008 | 3.54E-14     | 0.030                   | 0.019 | 0.104        |
| rs12413578  | -0.093                           | 0.009 | 3.31E-23     | 0.025                   | 0.021 | 0.246        |
| rs12440045  | 0.040                            | 0.006 | 7.68E-12     | 0.009                   | 0.015 | 0.538        |
| rs12551834  | -0.062                           | 0.010 | 2.72E-09     | 0.010                   | 0.022 | 0.654        |
| rs12625547  | -0.043                           | 0.008 | 1.98E-08     | -0.014                  | 0.017 | 0.414        |
| rs1289273   | 0.035                            | 0.006 | 1.09E-09     | 0.013                   | 0.015 | 0.364        |
| rs12941864  | -0.034                           | 0.006 | 4.98E-08     | 0.018                   | 0.015 | 0.228        |
| rs1419675   | -0.039                           | 0.007 | 4.72E-08     | -0.024                  | 0.015 | 0.111        |
| rs144829310 | 0.083                            | 0.008 | 2.60E-26     | 0.028                   | 0.018 | 0.115        |
| rs1689510   | 0.051                            | 0.006 | 3.39E-17     | -0.019                  | 0.015 | 0.195        |
| rs16903574  | 0.070                            | 0.011 | 1.68E-10     | -0.010                  | 0.028 | 0.730        |
| rs17664743  | 0.041                            | 0.007 | 8.27E-09     | -0.011                  | 0.015 | 0.489        |
| rs1885013   | -0.038                           | 0.006 | 1.33E-09     | 0.013                   | 0.014 | 0.348        |
| rs2134814   | -0.043                           | 0.006 | 1.03E-12     | 0.015                   | 0.014 | 0.283        |
| rs2212434   | 0.087                            | 0.006 | 8.92E-52     | -0.032                  | 0.013 | 0.017        |
| rs2221641   | -0.042                           | 0.006 | 1.03E-12     | 0.006                   | 0.013 | 0.644        |
| rs2241099   | -0.070                           | 0.007 | 4.62E-26     | 0.010                   | 0.015 | 0.496        |
| rs228619    | 0.036                            | 0.006 | 2.41E-10     | -0.007                  | 0.013 | 0.596        |
| rs2477923   | -0.033                           | 0.006 | 7.23E-09     | -0.020                  | 0.013 | 0.141        |
| rs249677    | 0.037                            | 0.006 | 7.54E-10     | 0.008                   | 0.013 | 0.535        |
| rs2766678   | -0.056                           | 0.007 | 2.95E-14     | 0.015                   | 0.025 | 0.553        |
| rs2854001   | 0.054                            | 0.007 | 3.31E-14     | -0.032                  | 0.020 | 0.115        |
| rs2910162   | 0.034                            | 0.006 | 1.54E-08     | -0.010                  | 0.014 | 0.481        |
| rs301802    | 0.048                            | 0.006 | 1.33E-16     | 0.014                   | 0.013 | 0.292        |

|            |        |       |          |        |       |       |
|------------|--------|-------|----------|--------|-------|-------|
| rs3024665  | 0.067  | 0.012 | 2.18E-08 | 0.011  | 0.024 | 0.638 |
| rs3128959  | -0.060 | 0.010 | 2.25E-10 | -0.015 | 0.022 | 0.491 |
| rs34004019 | -0.091 | 0.007 | 2.52E-38 | 0.022  | 0.019 | 0.233 |
| rs34290285 | -0.077 | 0.008 | 1.16E-24 | -0.003 | 0.014 | 0.816 |
| rs3540     | -0.035 | 0.006 | 1.28E-08 | -0.006 | 0.014 | 0.683 |
| rs4296977  | -0.053 | 0.008 | 6.92E-11 | -0.019 | 0.020 | 0.342 |
| rs479844   | 0.041  | 0.006 | 1.15E-12 | 0.002  | 0.013 | 0.871 |
| rs4943794  | 0.040  | 0.007 | 1.41E-08 | 0.001  | 0.017 | 0.950 |
| rs4973380  | 0.040  | 0.007 | 2.59E-09 | 0.022  | 0.016 | 0.163 |
| rs519973   | 0.036  | 0.006 | 3.23E-09 | -0.009 | 0.016 | 0.559 |
| rs56375023 | 0.073  | 0.007 | 3.11E-27 | 0.000  | 0.016 | 0.982 |
| rs5743618  | -0.092 | 0.007 | 2.73E-42 | 0.001  | 0.016 | 0.931 |
| rs5758343  | -0.047 | 0.007 | 2.17E-11 | 0.020  | 0.018 | 0.257 |
| rs58939053 | 0.054  | 0.006 | 3.85E-19 | -0.015 | 0.016 | 0.376 |
| rs6011033  | 0.044  | 0.007 | 2.66E-10 | 0.021  | 0.016 | 0.204 |
| rs61192126 | -0.038 | 0.006 | 1.56E-09 | -0.009 | 0.015 | 0.537 |
| rs61816766 | 0.142  | 0.018 | 6.76E-16 | -0.077 | 0.047 | 0.105 |
| rs62626322 | 0.067  | 0.009 | 1.35E-13 | -0.011 | 0.021 | 0.589 |
| rs6461503  | -0.041 | 0.006 | 8.81E-13 | 0.008  | 0.013 | 0.573 |
| rs6489785  | -0.043 | 0.006 | 3.57E-13 | 0.016  | 0.014 | 0.246 |
| rs6594499  | -0.072 | 0.006 | 1.10E-36 | -0.013 | 0.014 | 0.350 |
| rs6800001  | 0.033  | 0.006 | 2.28E-08 | 0.019  | 0.014 | 0.164 |
| rs6881706  | -0.071 | 0.006 | 1.73E-28 | -0.005 | 0.014 | 0.738 |
| rs6990534  | -0.040 | 0.006 | 1.74E-10 | 0.011  | 0.013 | 0.420 |
| rs7224129  | 0.054  | 0.006 | 8.11E-21 | -0.016 | 0.013 | 0.216 |
| rs72774901 | 0.112  | 0.011 | 3.92E-25 | -0.082 | 0.025 | 0.001 |
| rs740474   | -0.036 | 0.006 | 6.59E-10 | 0.026  | 0.013 | 0.051 |
| rs7406234  | -0.034 | 0.006 | 4.30E-09 | -0.013 | 0.013 | 0.354 |
| rs74847330 | -0.050 | 0.009 | 1.67E-08 | 0.022  | 0.020 | 0.283 |
| rs7521390  | 0.036  | 0.006 | 1.39E-08 | -0.032 | 0.015 | 0.026 |
| rs760805   | 0.037  | 0.006 | 3.79E-10 | -0.012 | 0.013 | 0.355 |
| rs80064395 | -0.073 | 0.011 | 1.31E-11 | 0.000  | 0.024 | 0.996 |
| rs8030821  | 0.034  | 0.006 | 1.54E-08 | -0.016 | 0.015 | 0.298 |
| rs848      | -0.060 | 0.007 | 1.62E-16 | 0.022  | 0.015 | 0.151 |
| rs9372120  | 0.041  | 0.007 | 1.02E-08 | -0.004 | 0.017 | 0.802 |
| rs9877752  | 0.040  | 0.006 | 4.98E-12 | 0.004  | 0.014 | 0.774 |

14 COVID-19: corona virus disease 2019; GWAS: genome wide association study; SNP:  
15 single-nucleotide polymorphism; Beta: the regression coefficient based on the allergic  
16 disease effect allele; SE: standard error.

17

18 **Supplementary table 4.** Pleiotropy and heterogeneity test of allergic disease genetic

19 IVs in COVID-19 GWAS.

| Pleiotropy test |       |              |              | Heterogeneity test |      |              |        |      |              |
|-----------------|-------|--------------|--------------|--------------------|------|--------------|--------|------|--------------|
| MR_Egger        |       |              | PRESSO       | MR Egger           |      |              | IVW    |      |              |
| Intercept       | SE    | <i>p</i> val | <i>p</i> val | Q                  | Q_df | <i>p</i> val | Q      | Q_df | <i>p</i> val |
| 0.007           | 0.005 | 0.181        | 0.494        | 69.990             | 72   | 0.545        | 71.812 | 73   | 0.517        |

20 COVID-19: corona virus disease 2019; GWAS: genome wide association study; IVW:

21 inverse variance weighted; SE: standard error. *p* val > 0.05 represent no significant

22 pleiotropy or heterogeneity.

23

24 **Supplementary figure 1.**

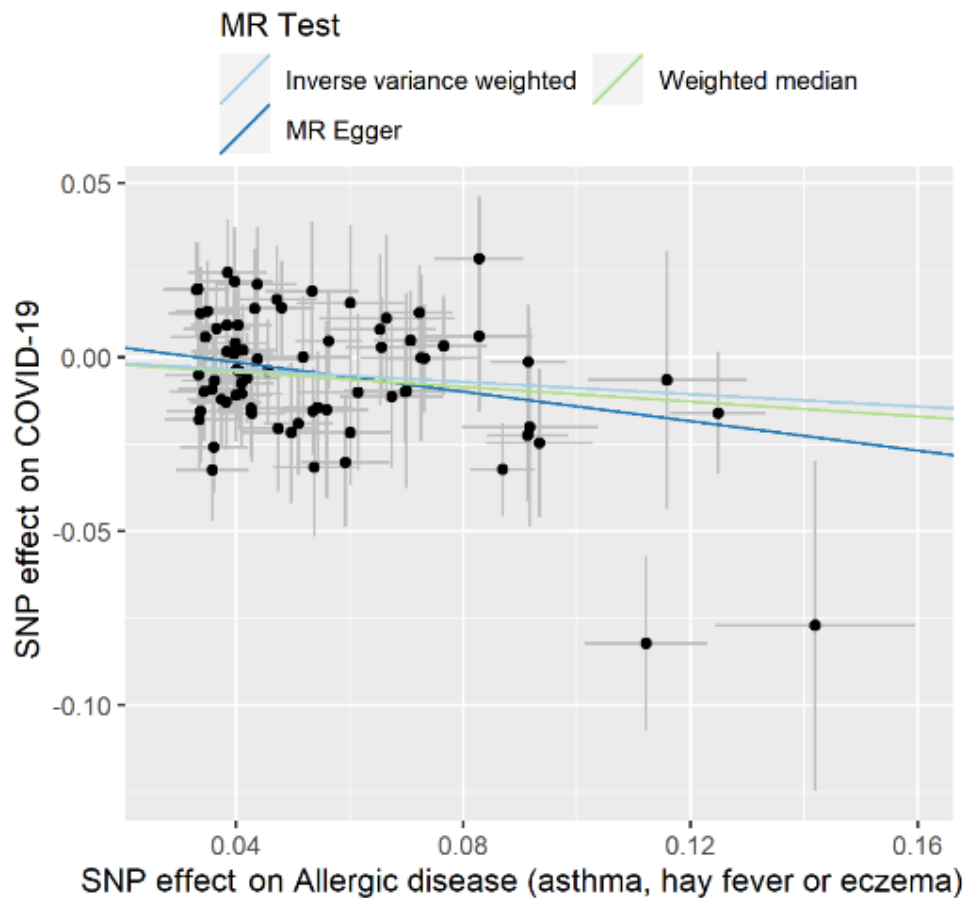

25

26 **Supplementary figure 1. Individual estimates about the causal effect of allergic**

27 **disease on COVID-19.** The x-axis shows the SNP (single nucleotide polymorphism)

28 effect and SE (standard error) on each of allergic disease. The y-axis shows the SNP

29 effect and SE on COVID-19 by analyzing GWAS ID: ebi-a-GCST010780. The

30 regression line for MR Egger, Weighted median, and IVW is shown.

31

32 **Supplementary figure 2.**

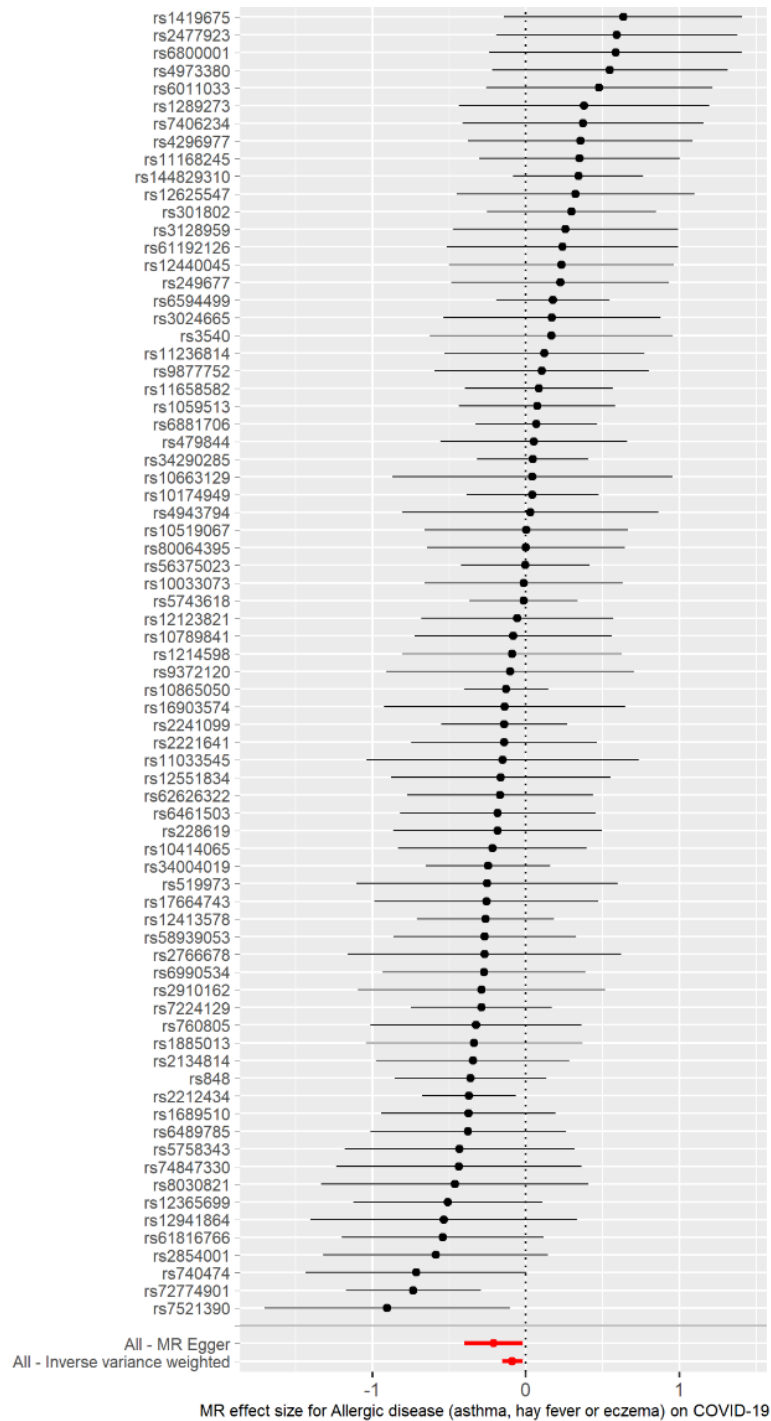

33

34 **Supplementary figure 2. Forest plot of allergic disease associated with risk of**  
35 **COVID-19.** The x-axis shows MR effect size for allergic disease on COVID-19 by  
36 analyzing GWAS ID: ebi-a-GCST010780. The y-axis shows the analysis for each of  
37 SNPs.



38 **Supplementary figure 3.**

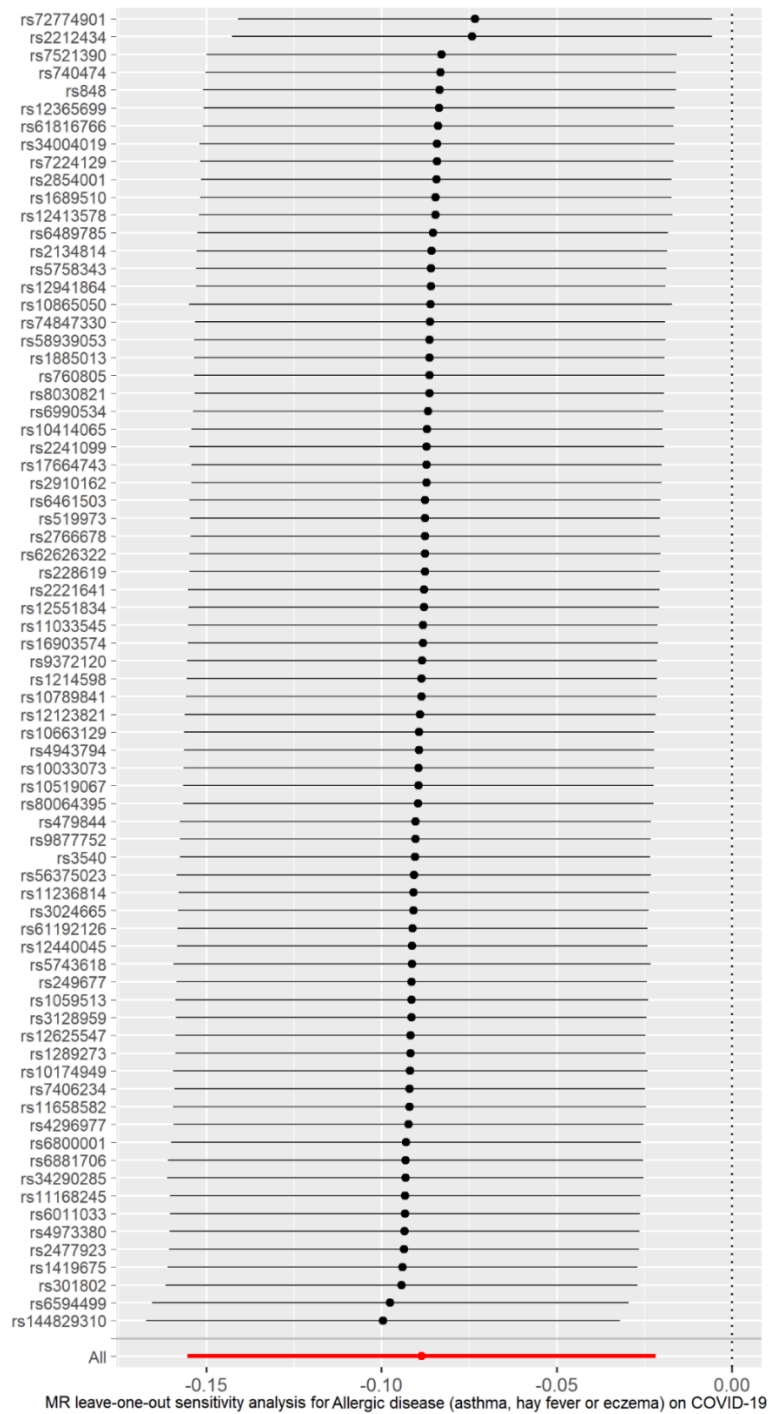

39

40 **Supplementary figure 3. MR leave-one-out sensitivity analysis for the effect of**  
41 **allergic disease SNPs on COVID-19.** The x-axis shows MR leave-one-out sensitivity  
42 analysis for allergic disease on COVID-19 by analyzing GWAS ID: ebi-a-GCST010780.  
43 The y-axis shows the analysis for the effect of leave-one-out of SNPs on COVID-19.
